# Supplementary material
Source: HighWire-hosted journal article supplement (https://bmjopen.bmj.com/content/9/7/e024859)
Supplement: inline-supplementary-material-1 [file inline-supplementary-material-1.pdf]

## Appendix 1: What Factors Influence Community Wound Care: Clinical Professional Focus Group Questions

| Questions                                                                                                        | Prompts for further exploration                                                                                                                                                                                                                                                                                                                                                                                                                                                                                                                                                                                                                                                                                                                                                                                                                                                                                                        | TDF Domains                                                                                                                                                                                                                                                                                                 |
|------------------------------------------------------------------------------------------------------------------|----------------------------------------------------------------------------------------------------------------------------------------------------------------------------------------------------------------------------------------------------------------------------------------------------------------------------------------------------------------------------------------------------------------------------------------------------------------------------------------------------------------------------------------------------------------------------------------------------------------------------------------------------------------------------------------------------------------------------------------------------------------------------------------------------------------------------------------------------------------------------------------------------------------------------------------|-------------------------------------------------------------------------------------------------------------------------------------------------------------------------------------------------------------------------------------------------------------------------------------------------------------|
| How do you decide which dressing or treatment to use for which patient?                                          | <p>What factors contribute and how is it/are they obtained? Please provide examples to explain answers</p> <ul style="list-style-type: none"> <li>• Knowledge and skills, <ul style="list-style-type: none"> <li>○ Under/post grad training/regular updates</li> <li>○ Peers/networking</li> <li>○ Experience/Expertise</li> <li>○ Preferences</li> <li>○ Specialist support</li> <li>○ Conferences/seminars</li> <li>○ Pharmaceutical reps/fact sheets</li> </ul> </li> <li>• Research evidence <ul style="list-style-type: none"> <li>○ Reading journals</li> <li>○ On-line search</li> <li>○ National guidelines</li> <li>○ Communicated via wound care specialists</li> </ul> </li> <li>• Patient and carers' influence <ul style="list-style-type: none"> <li>○ Lifestyle</li> <li>○ Adherence</li> <li>○ Choice/Preference</li> <li>○ Anatomical factors /dressing suitability for foot in mobile patient</li> </ul> </li> </ul> | <p>Skills Knowledge</p> <p>Social professional role and identity</p> <p>Behavioral Regulation</p> <p>Environmental context and resources</p> <p>Beliefs about capabilities</p> <p>Memory, attention and decision processes</p> <p>Beliefs about consequences</p> <p>Motivation and goals</p> <p>Emotion</p> |
| Are there any environmental (organisational or resource based) factors that influence your prescribing practice? | <p>Are the following enablers or barriers?</p> <ul style="list-style-type: none"> <li>• Processes e.g. having a formulary in place? <ul style="list-style-type: none"> <li>○ If a formulary is in place is ordering from it mandatory?</li> </ul> </li> <li>• Product cost?</li> <li>• Value for money? <ul style="list-style-type: none"> <li>○ Are some products worth paying more for e.g. silver/soft silicon?</li> <li>○ What additional benefits do they provide?</li> <li>○ How do you justify the additional cost?</li> </ul> </li> <li>• Product availability?</li> <li>• Product knowledge? Why choose one product over another?</li> <li>• Memory (considering the number of products available)?</li> <li>• Training? Competence?</li> <li>• Caseload? Autonomy?</li> <li>• Team support?</li> </ul>                                                                                                                       | <p>Behavioral Regulation</p> <p>Environmental context and resources</p> <p>Knowledge</p> <p>Skills</p> <p>Beliefs about capabilities</p> <p>Memory, attention and decision processes</p> <p>Beliefs about capabilities</p>                                                                                  |

| Questions                                                                                                                    | Prompts for further exploration                                                                                                                                                                                                                                                                                                                                                                                                                                                                                                                                                                                                | TDF Domains                                                                                                                                                     |
|------------------------------------------------------------------------------------------------------------------------------|--------------------------------------------------------------------------------------------------------------------------------------------------------------------------------------------------------------------------------------------------------------------------------------------------------------------------------------------------------------------------------------------------------------------------------------------------------------------------------------------------------------------------------------------------------------------------------------------------------------------------------|-----------------------------------------------------------------------------------------------------------------------------------------------------------------|
| Do you have any influence on what products are included in your Trust formulary?                                             | How?<br><br>Who else is involved?<br><br>If not you – who decides                                                                                                                                                                                                                                                                                                                                                                                                                                                                                                                                                              | Social professional role and identity<br><br>Skills<br><br>Environmental context and resources<br><br>Beliefs about capabilities<br><br>Nature of the behaviors |
| Have other people or situations ever caused you to change your wound care practices?                                         | An incident? What happened?<br><br>Service reconfiguration? Why was this necessary?<br><br>A change in policy? Why was the policy changed? How was the change implemented?<br><br>A colleague? An expert in the field?<br><br>What processes are in place to share practice relating to product usage?<br><br>Do current networks adequately promote shared care between teams and services? If not what do you think needs to be done to improve this?                                                                                                                                                                        | Behavioral Regulation<br><br>Environmental context and resources<br><br>Nature of the behaviors<br><br>Social influences                                        |
| How do you know you are/your service or your trust is making the right decisions regarding product use and service delivery? | Have you completed any audits of clinical care, clinical outcomes or service outcomes?<br><ul style="list-style-type: none"> <li>Are prescribing practices audited? If so how frequently?</li> <li>Are prescribing skills audited? If so how frequently?</li> <li>Are prescribing skills regularly monitored/ appraised? If so how frequently?</li> <li>Do you have a PDP? Do attend regular personal development reviews? How often?</li> <li>Do you receive regular updates at trust or service level regarding service delivery achievements?</li> </ul> What other measures are in place to monitor prescribing practices? | Behavioral Regulation<br><br>Motivation and goals                                                                                                               |

| Now you have had time to look at the wound care product expenditure..... |                                                                                                                                                                                                                                                                                                                                                                                                         |                                                                                                                            |
|--------------------------------------------------------------------------|---------------------------------------------------------------------------------------------------------------------------------------------------------------------------------------------------------------------------------------------------------------------------------------------------------------------------------------------------------------------------------------------------------|----------------------------------------------------------------------------------------------------------------------------|
| Questions                                                                | Prompts for further exploration                                                                                                                                                                                                                                                                                                                                                                         | TDF Domains                                                                                                                |
| Are the overall figures what you were expecting?                         | <p>Is the overall spend higher or lower than you were expecting?</p> <p>What do you think has caused the difference (if any)?</p> <p>How do you feel about the differences or similarities with neighboring Trusts and national figures?</p>                                                                                                                                                            | <p>Knowledge</p> <p>Beliefs about consequences</p> <p>Behavioral Regulation</p> <p>Environmental context and resources</p> |
| Does the expenditure for any particular product group surprise you?      | <p>Are you surprised that it is low or high expenditure?</p> <p>Why does it surprise you?</p> <p>What do you think has caused this?</p> <p>How do you feel about the differences with neighboring Trusts and national figures?</p>                                                                                                                                                                      | <p>Knowledge</p> <p>Beliefs about consequences</p> <p>Environmental context and resources</p> <p>Behavioral Regulation</p> |
| Do you think there is over or under use of any product group?            | <p>Which group(s)? Is this over or under used?</p> <p>What do you think has caused this?</p> <p>Prior to seeing the figures, which product groups did you believe were used the most frequently?</p> <p>Prior to seeing the figures, which product groups did you believe were used the least frequently?</p> <p>How do you feel about the comparison with neighboring Trusts and national figures?</p> | <p>Knowledge</p> <p>Skills</p> <p>Beliefs about consequences</p> <p>Environmental context and resources</p>                |
